# Supplementary material for: A New Multidimensional Questionnaire to Assess Awareness of Age-Related Change (AARC)
Source: Oxford University Press journal article supplement (doi:10.1093/geront/gny006), 2018-02-15
Supplement: gny006_suppl_supplementary-material.pdf [file gny006_suppl_supplementary-material.pdf]

# Awareness of Age-Related Change 50-Item Questionnaire (AARC-50)

## Measurement Guide

### Scoring Details, Syntax, and Formatted Questionnaire

Manfred Diehl, PhD  
Allyson F. Brothers, PhD  
Hans-Werner Wahl, PhD  
Martina Gabrian, PhD

Direct correspondence and questions to: [Manfred.Diehl@colostate.edu](mailto:Manfred.Diehl@colostate.edu)

Follow standard APA Publication Manual format and cite the article describing the development of the AARC-50 Questionnaire as:

Brothers, A. F., Gabrian, M., Wahl, H.-W., & Diehl, M. (2018). A new multi-dimensional questionnaire to assess Awareness of Age-Related Change (AARC). *The Gerontologist*. DOI: 10.1093/geront/gny006.

Cite this AARC-50 Measurement Guide as:

Diehl, M., Brothers, A. F., Wahl, H.-W., & Gabrian, M. (2018). *Awareness of Age-Related Change 50-Item Questionnaire (AARC-50): Measurement Guide*. Fort Collins, CO: Colorado State University.

## AARC-50 Scoring Details:

| <b>PRIMARY SCALES</b><br>Sum the items below to obtain corresponding subscale scores                                                                                                                                                        |                                                           |                                                                                                |
|---------------------------------------------------------------------------------------------------------------------------------------------------------------------------------------------------------------------------------------------|-----------------------------------------------------------|------------------------------------------------------------------------------------------------|
| Abbreviation                                                                                                                                                                                                                                | Subscale Name                                             | Item Numbers                                                                                   |
| GAIN                                                                                                                                                                                                                                        | AARC-Gains                                                | 1, 5, 6, 8, 10, 12, 14, 15, 18, 19, 21, 23, 25, 29, 31, 33, 35, 37, 39, 40, 41, 43, 44, 49, 50 |
| LOSS                                                                                                                                                                                                                                        | AARC-Losses                                               | 2, 3, 4, 7, 9, 11, 13, 16, 17, 20, 22, 24, 26, 27, 28, 30, 32, 34, 36, 38, 42, 45, 46, 47, 48  |
| <b>BEHAVIORAL DOMAIN SUBSCALES – POSITIVE</b><br>Sum the items below to obtain corresponding subscale scores                                                                                                                                |                                                           |                                                                                                |
| PP                                                                                                                                                                                                                                          | Health & Physical Functioning – Positive                  | 5, 25, 29, 35, 43                                                                              |
| CP                                                                                                                                                                                                                                          | Cognitive Functioning – Positive                          | 12, 21, 33, 44, 49                                                                             |
| IP                                                                                                                                                                                                                                          | Interpersonal Relations – Positive                        | 1, 6, 19, 39, 50                                                                               |
| SP                                                                                                                                                                                                                                          | Social-Cognitive, Social-Emotional Functioning – Positive | 10, 14, 18, 23, 41                                                                             |
| LP                                                                                                                                                                                                                                          | Lifestyle and Engagement – Positive                       | 8, 15, 31, 37, 40                                                                              |
| <b>BEHAVIORAL DOMAIN SUBSCALES – NEGATIVE</b><br>Sum the items below to obtain corresponding subscale scores                                                                                                                                |                                                           |                                                                                                |
| PN                                                                                                                                                                                                                                          | Health & Physical Functioning – Negative                  | 7, 20, 22, 27, 36                                                                              |
| CN                                                                                                                                                                                                                                          | Cognitive Functioning – Negative                          | 3, 9, 17, 26, 38                                                                               |
| IN                                                                                                                                                                                                                                          | Interpersonal Relations – Negative                        | 11, 30, 34, 42, 45                                                                             |
| SN                                                                                                                                                                                                                                          | Social-Cognitive, Social-Emotional Functioning – Negative | 4, 13, 16, 24, 47                                                                              |
| LN                                                                                                                                                                                                                                          | Lifestyle and Engagement – Negative                       | 2, 28, 32, 46, 48                                                                              |
| <b>SCORING DETAILS:</b>                                                                                                                                                                                                                     |                                                           |                                                                                                |
| <b>Possible Range for Each Domain: 5 (min) – 25 (max)</b>                                                                                                                                                                                   |                                                           |                                                                                                |
| <b>A Higher Score Indicates:</b>                                                                                                                                                                                                            |                                                           |                                                                                                |
| <ul style="list-style-type: none"> <li>• <b>AARC-Gains and Positive Subscales:</b> More perceived positive age-related changes</li> <li>• <b>AARC-Losses and Negative Subscales:</b> More perceived negative age-related changes</li> </ul> |                                                           |                                                                                                |

## AARC-50 Scoring Syntax for SPSS:

### SPSS Syntax for Scoring

*/\* Notes for scoring.*

*\* Calculate sum scores ONLY if all scale items are answered.*

/Calculate Overarching Gain-Loss Scales

```
COMPUTE GAIN=SUM.25(aarc5, aarc25,aarc29,aarc35,aarc43,aarc12,  
aarc21,aarc33,aarc44,aarc49,aarc1,aarc6,aarc19,aarc39,aarc50,aarc10,  
aarc14,aarc18,aarc23,aarc41,aarc8,aarc15,aarc31,aarc37,aarc40).  
EXECUTE.
```

```
COMPUTE LOSS=SUM.25(aarc7, aarc20,aarc22,aarc27,aarc36,aarc3,  
aarc9,aarc17,aarc26,aarc38,aarc11,aarc30,aarc34,aarc42,aarc45,aarc4,  
aarc13,aarc16,aarc24,aarc47,aarc2,aarc28,aarc32,aarc46,aarc48).  
EXECUTE.
```

/Calculate Behavioral Domain Subscales

/Note that Scales are Grouped by Behavioral Domain with Positive First and Negative Second

```
COMPUTE PP= SUM.5(aarc5, aarc25,aarc29,aarc35,aarc43).  
EXECUTE.
```

```
COMPUTE PN= SUM.5(aarc7, aarc20,aarc22,aarc27,aarc36).  
EXECUTE.
```

```
COMPUTE CP= SUM.5(aarc12, aarc21,aarc33,aarc44,aarc49).  
EXECUTE.
```

```
COMPUTE CN= SUM.5(aarc3, aarc9,aarc17,aarc26,aarc38).  
EXECUTE.
```

```
COMPUTE IP= SUM.5(aarc1, aarc6,aarc19,aarc39,aarc50).  
EXECUTE.
```

```
COMPUTE IN= SUM.5(aarc11, aarc30,aarc34,aarc42,aarc45).  
EXECUTE.
```

```
COMPUTE SP= SUM.5(aarc10, aarc14,aarc18,aarc23,aarc41).  
EXECUTE.
```

```
COMPUTE SN= SUM.5(aarc4, aarc13,aarc16,aarc24,aarc47).  
EXECUTE.
```

```
COMPUTE LP= SUM.5(aarc8, aarc15,aarc31,aarc37,aarc40).  
EXECUTE.
```

```
COMPUTE LN= SUM.5(aarc2, aarc28,aarc32,aarc46,aarc48).  
EXECUTE.
```

## AARC-50

**INSTRUCTIONS:** This questionnaire contains statements on how a person may feel about getting older. We are interested in how YOU feel about getting older and what you can tell us about your own experiences. We are mostly interested in whether certain experiences apply to you and to what extent you can relate to them given that you may have experienced them yourself as the years have passed.

Please read each statement carefully and answer in the following way:

| Not at all | A little bit | Moderately | Quite a bit | Very much |
|------------|--------------|------------|-------------|-----------|
| <u>1</u>   | <u>2</u>     | <u>3</u>   | <u>4</u>    | <u>5</u>  |
| <b>○</b>   | <b>○</b>     | <b>○</b>   | <b>○</b>    | <b>○</b>  |

- If a statement very much reflects your own experience, then you would fill in the circle under the number “5”, which stands for “***Very much.***”
- If a statement does not reflect your own experience at all, then you indicate that by filling in the circle under the number “1”, which stands for “***Not at all.***”
- If a statement reflects your own experiences more than “a little bit” but less than “quite a bit,” then you should fill in the circle under the number “3”, which stands for “***Moderately.***”

There are no “right” or “wrong” answers to the statements on this questionnaire. We are simply interested in your own personal experiences and your honest opinion.

Please read each statement carefully and then answer as spontaneously as possible.

Please turn the page and begin.

| <b>With <u>my</u> increasing age,<br/>I realize that ...</b> |                                                     | Not at<br>all         | A little<br>bit       | Moderately            | Quite a<br>bit        | Very<br>much          |
|--------------------------------------------------------------|-----------------------------------------------------|-----------------------|-----------------------|-----------------------|-----------------------|-----------------------|
|                                                              |                                                     | 1                     | 2                     | 3                     | 4                     | 5                     |
| 1                                                            | ... others are treating me more respectfully.       | <input type="radio"/> |
| 2                                                            | ...I need more time for everything I do.            | <input type="radio"/> |
| 3                                                            | ...my mental capacity is declining.                 | <input type="radio"/> |
| 4                                                            | ...I am more anxious about the future.              | <input type="radio"/> |
| 5                                                            | ...I pay more attention to my health.               | <input type="radio"/> |
| 6                                                            | ...I appreciate relationships and people much more. | <input type="radio"/> |
| 7                                                            | ...my ability to move around has gotten worse.      | <input type="radio"/> |
| 8                                                            | ...I have more say in setting my daily routine.     | <input type="radio"/> |
| 9                                                            | ...I am slower in my thinking.                      | <input type="radio"/> |
| 10                                                           | ...I recognize my own needs better.                 | <input type="radio"/> |
| 11                                                           | ...people sometimes treat me as if I was not there. | <input type="radio"/> |

| <b>With <u>my</u> increasing age,<br/>I realize that ...</b> |                                                                        | <b>Not at<br/>all</b> | <b>A little<br/>bit</b> | <b>Moderately</b>     | <b>Quite a<br/>bit</b> | <b>Very<br/>much</b>  |
|--------------------------------------------------------------|------------------------------------------------------------------------|-----------------------|-------------------------|-----------------------|------------------------|-----------------------|
|                                                              |                                                                        | <b>1</b>              | <b>2</b>                | <b>3</b>              | <b>4</b>               | <b>5</b>              |
| 12                                                           | ...I have more experience and knowledge to evaluate things and people. | <input type="radio"/> | <input type="radio"/>   | <input type="radio"/> | <input type="radio"/>  | <input type="radio"/> |
| 13                                                           | ...I think more about death and dying.                                 | <input type="radio"/> | <input type="radio"/>   | <input type="radio"/> | <input type="radio"/>  | <input type="radio"/> |
| 14                                                           | ...I have a better sense of what is important to me.                   | <input type="radio"/> | <input type="radio"/>   | <input type="radio"/> | <input type="radio"/>  | <input type="radio"/> |
| 15                                                           | ...I enjoy life more consciously.                                      | <input type="radio"/> | <input type="radio"/>   | <input type="radio"/> | <input type="radio"/>  | <input type="radio"/> |
| 16                                                           | ...I feel increasingly isolated from the world around me.              | <input type="radio"/> | <input type="radio"/>   | <input type="radio"/> | <input type="radio"/>  | <input type="radio"/> |
| 17                                                           | ...I have a harder time concentrating.                                 | <input type="radio"/> | <input type="radio"/>   | <input type="radio"/> | <input type="radio"/>  | <input type="radio"/> |
| 18                                                           | ...I am more grateful for the things I have.                           | <input type="radio"/> | <input type="radio"/>   | <input type="radio"/> | <input type="radio"/>  | <input type="radio"/> |
| 19                                                           | ...my friendships and relationships have become stronger.              | <input type="radio"/> | <input type="radio"/>   | <input type="radio"/> | <input type="radio"/>  | <input type="radio"/> |
| 20                                                           | ...I have less energy.                                                 | <input type="radio"/> | <input type="radio"/>   | <input type="radio"/> | <input type="radio"/>  | <input type="radio"/> |
| 21                                                           | ...I have more foresight.                                              | <input type="radio"/> | <input type="radio"/>   | <input type="radio"/> | <input type="radio"/>  | <input type="radio"/> |
| 22                                                           | ...my body needs rest more often.                                      | <input type="radio"/> | <input type="radio"/>   | <input type="radio"/> | <input type="radio"/>  | <input type="radio"/> |

| <b>With <u>my</u> increasing age,<br/>I realize that ...</b> |                                                                                    | Not at<br>all         | A little<br>bit       | Moderately            | Quite a<br>bit        | Very<br>much          |
|--------------------------------------------------------------|------------------------------------------------------------------------------------|-----------------------|-----------------------|-----------------------|-----------------------|-----------------------|
|                                                              |                                                                                    | 1                     | 2                     | 3                     | 4                     | 5                     |
| 23                                                           | ...I try to be more myself.                                                        | <input type="radio"/> |
| 24                                                           | ...I am sad more often.                                                            | <input type="radio"/> |
| 25                                                           | ...I pay more attention to eating healthy food.                                    | <input type="radio"/> |
| 26                                                           | ...learning new things takes more time and effort.                                 | <input type="radio"/> |
| 27                                                           | ...my physical ability is not what it used to be.                                  | <input type="radio"/> |
| 28                                                           | ...I don't do as many things anymore.                                              | <input type="radio"/> |
| 29                                                           | ...I take more time to focus on my physical shape.                                 | <input type="radio"/> |
| 30                                                           | ...other people do things for me because they assume that I can't do them anymore. | <input type="radio"/> |
| 31                                                           | ...I have more time for the things I enjoy.                                        | <input type="radio"/> |
| 32                                                           | ...I feel less financially secure.                                                 | <input type="radio"/> |

| <b>With <u>my</u> increasing age,<br/>I realize that ...</b> |                                                        | Not at<br>all         | A little<br>bit       | Moderately            | Quite a<br>bit        | Very<br>much          |
|--------------------------------------------------------------|--------------------------------------------------------|-----------------------|-----------------------|-----------------------|-----------------------|-----------------------|
|                                                              |                                                        | 1                     | 2                     | 3                     | 4                     | 5                     |
| 33                                                           | ...I gather more information before I make decisions.  | <input type="radio"/> |
| 34                                                           | ...other people are more reserved toward me.           | <input type="radio"/> |
| 35                                                           | ...I pay more attention to regular physical exercise.  | <input type="radio"/> |
| 36                                                           | ...I have more aches and pains in my body.             | <input type="radio"/> |
| 37                                                           | ...I enjoy many things more intensively.               | <input type="radio"/> |
| 38                                                           | ...I am more forgetful.                                | <input type="radio"/> |
| 39                                                           | ...I am more open toward other people.                 | <input type="radio"/> |
| 40                                                           | ...I have more freedom to live my days the way I want. | <input type="radio"/> |
| 41                                                           | ...I have grown in terms of my self-confidence.        | <input type="radio"/> |
| 42                                                           | ...I feel more dependent on the help of others.        | <input type="radio"/> |



| <b>With <u>my</u> increasing age,<br/>I realize that ...</b> |                                                                            | <b>Not at<br/>all</b> | <b>A little<br/>bit</b> | <b>Moderately</b>     | <b>Quite a<br/>bit</b> | <b>Very<br/>much</b>  |
|--------------------------------------------------------------|----------------------------------------------------------------------------|-----------------------|-------------------------|-----------------------|------------------------|-----------------------|
|                                                              |                                                                            | <b>1</b>              | <b>2</b>                | <b>3</b>              | <b>4</b>               | <b>5</b>              |
| 43                                                           | ...I pay more attention to getting enough sleep.                           | <input type="radio"/> | <input type="radio"/>   | <input type="radio"/> | <input type="radio"/>  | <input type="radio"/> |
| 44                                                           | ...I have become wiser.                                                    | <input type="radio"/> | <input type="radio"/>   | <input type="radio"/> | <input type="radio"/>  | <input type="radio"/> |
| 45                                                           | ...others are treating me with less patience.                              | <input type="radio"/> | <input type="radio"/>   | <input type="radio"/> | <input type="radio"/>  | <input type="radio"/> |
| 46                                                           | ...I have to limit my activities.                                          | <input type="radio"/> | <input type="radio"/>   | <input type="radio"/> | <input type="radio"/>  | <input type="radio"/> |
| 47                                                           | ...I find it harder to motivate myself.                                    | <input type="radio"/> | <input type="radio"/>   | <input type="radio"/> | <input type="radio"/>  | <input type="radio"/> |
| 48                                                           | ...I am concerned what will happen once I can no longer do certain things. | <input type="radio"/> | <input type="radio"/>   | <input type="radio"/> | <input type="radio"/>  | <input type="radio"/> |
| 49                                                           | ...I think things through more carefully.                                  | <input type="radio"/> | <input type="radio"/>   | <input type="radio"/> | <input type="radio"/>  | <input type="radio"/> |
| 50                                                           | ...my family has become more important to me.                              | <input type="radio"/> | <input type="radio"/>   | <input type="radio"/> | <input type="radio"/>  | <input type="radio"/> |
